# Supplementary material
Source: ML conference proceedings conference paper supplement (https://openreview.net/forum?id=iwC19lVBoq)

(a) Comparison of architectures

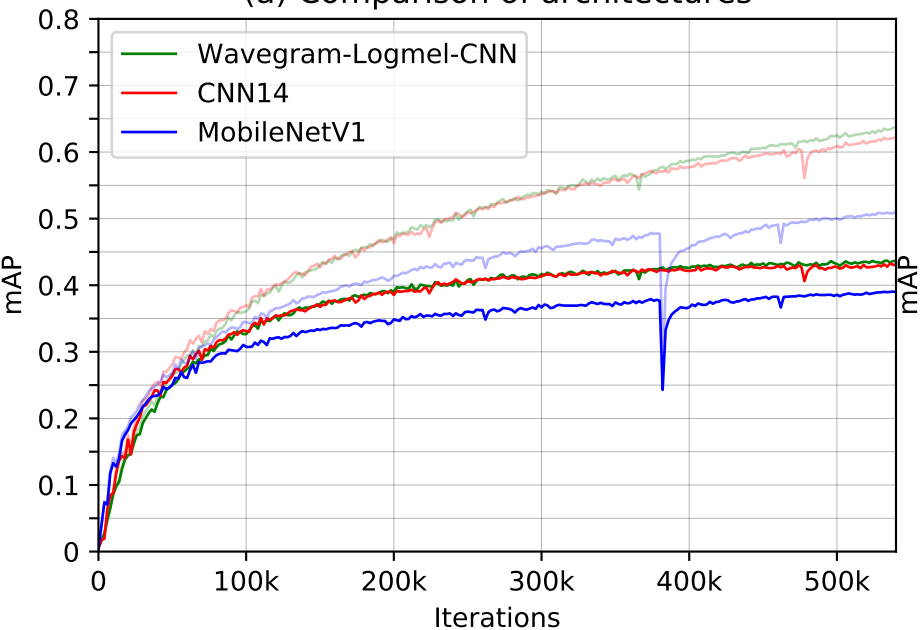

(b) Comparison of training data and augmentation

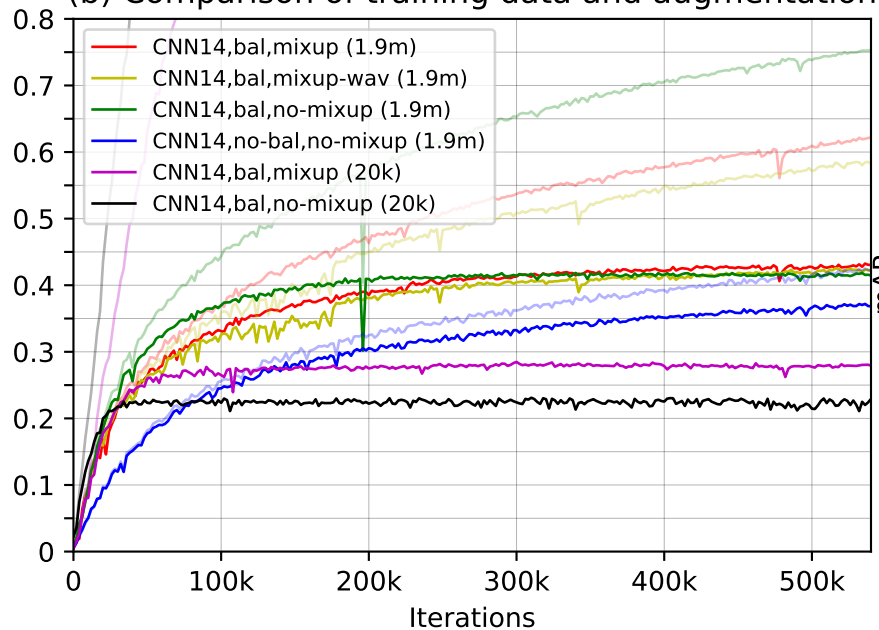

(c) Comparison of embedding size

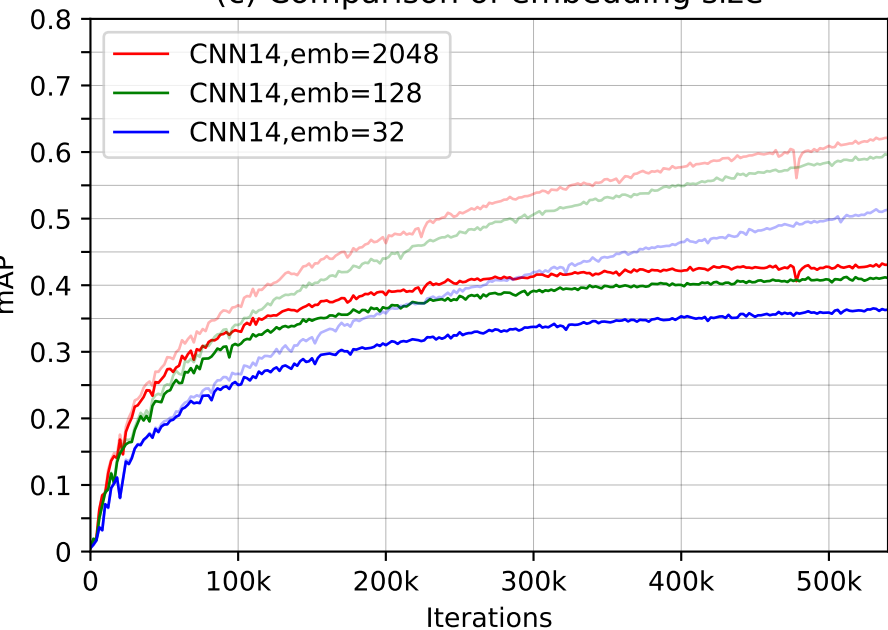

(d) Comparison of amount of training data

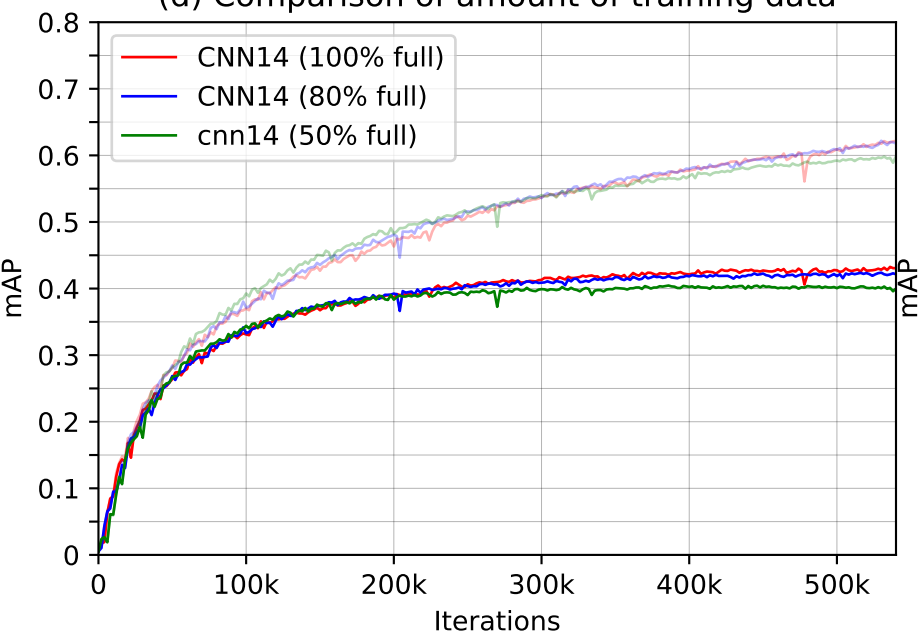

(e) Comparison of sampling rate

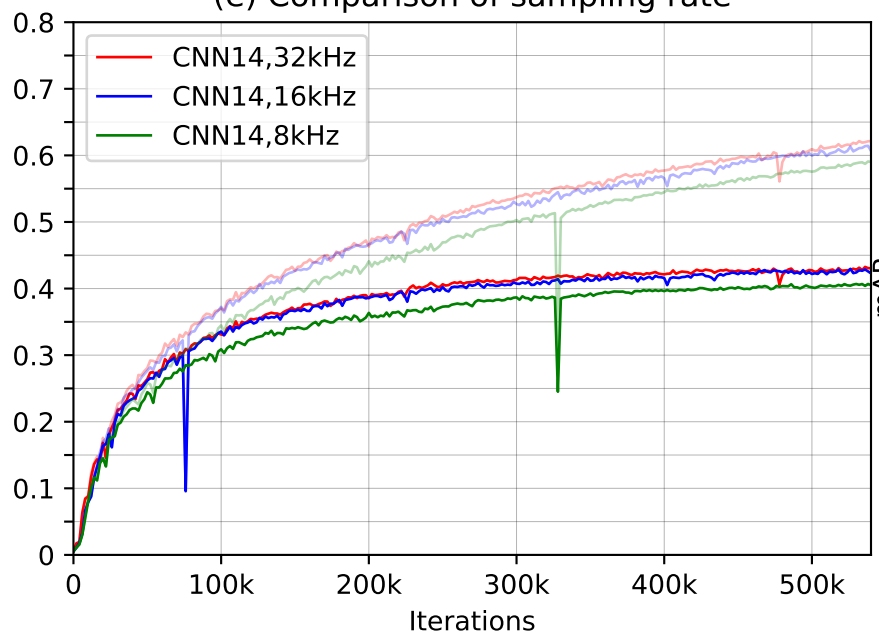

(f) Comparison of mel bins number

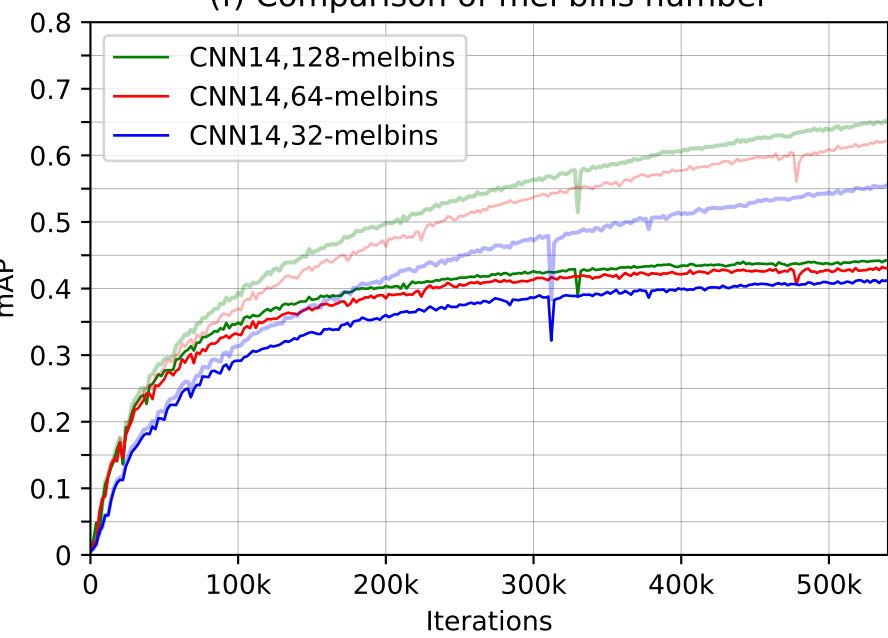

Supplement: supplementary_material [file attachment]
