# Supplementary material
Source: ML conference proceedings conference paper supplement (https://openreview.net/forum?id=iwC19lVBoq)

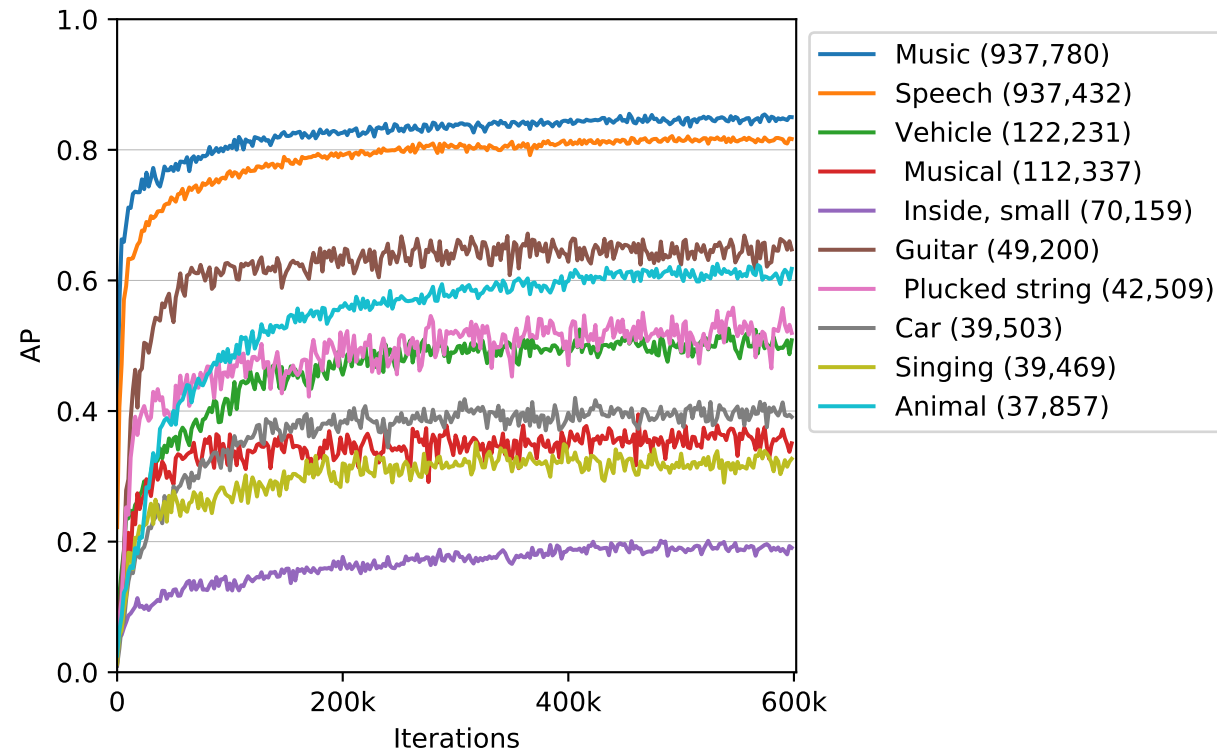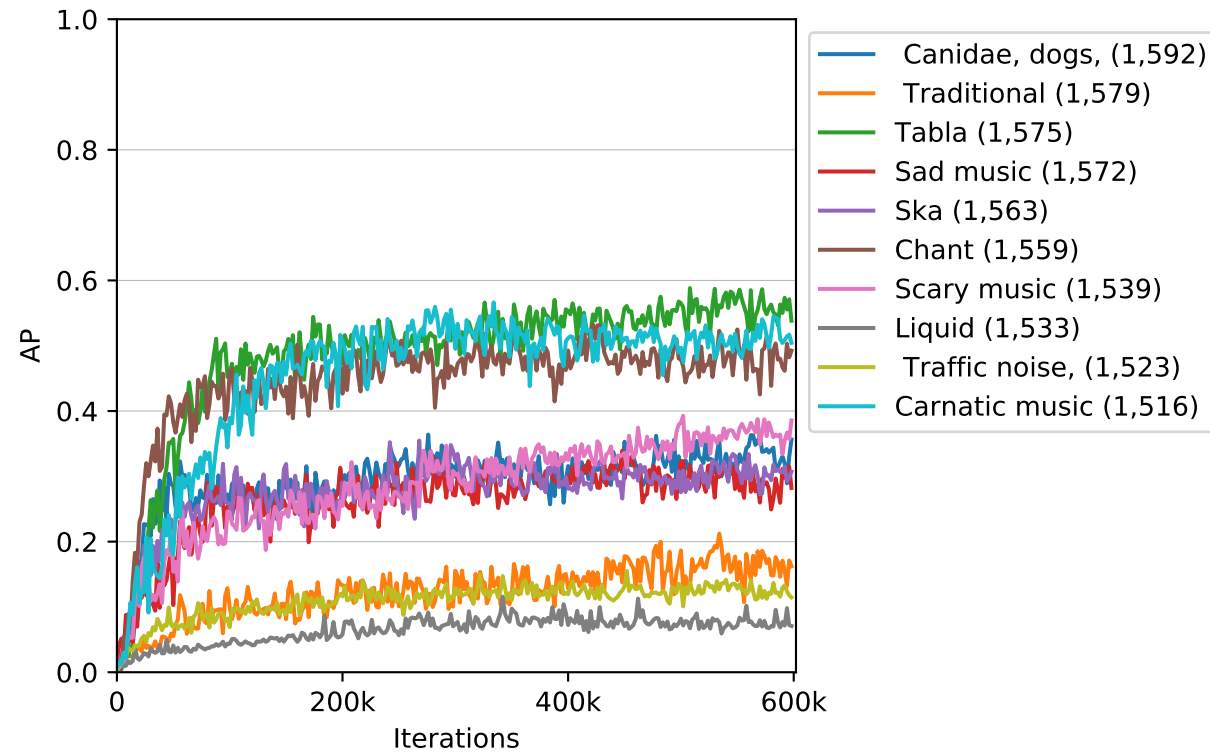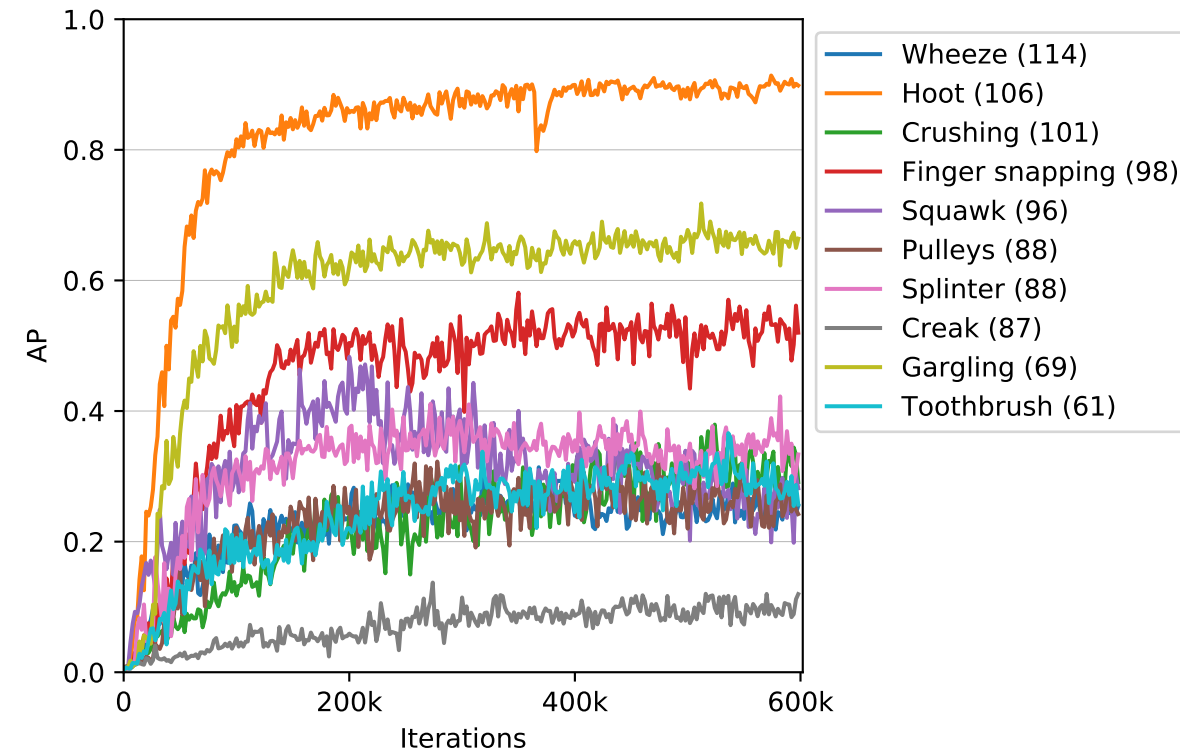

Supplement: supplementary_material [file attachment]

Number of audio clips

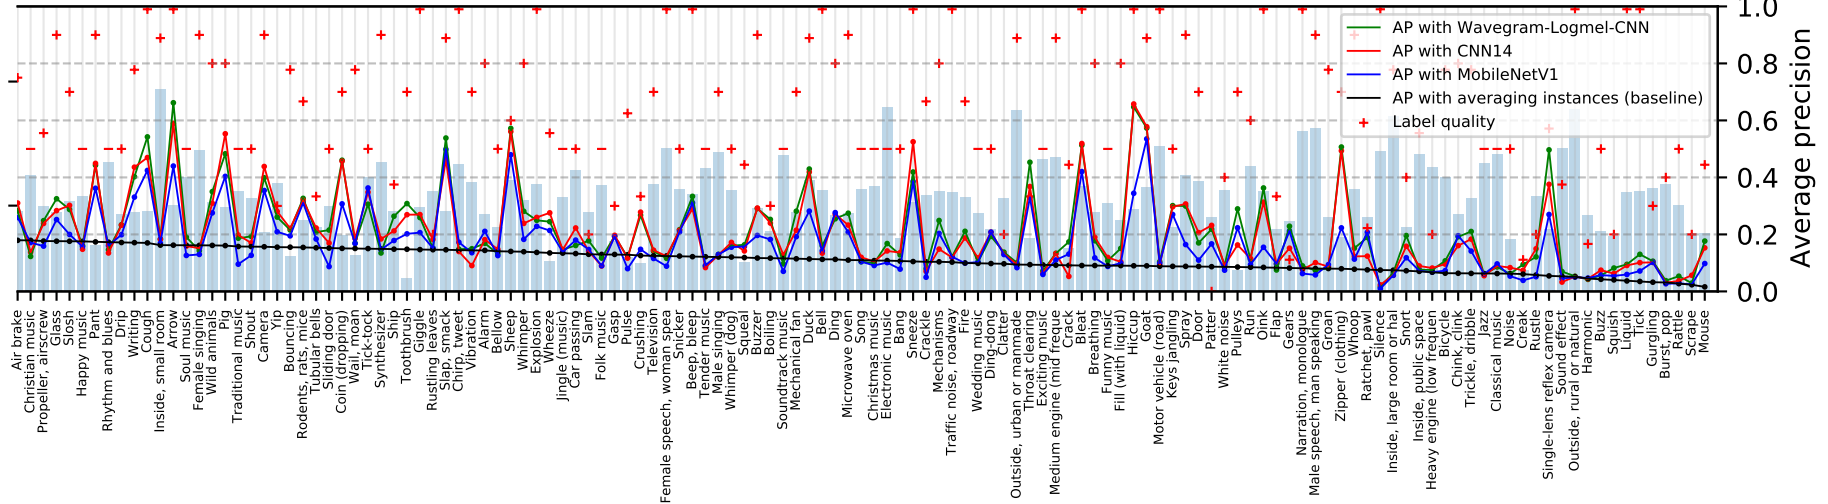

Number of audio clips

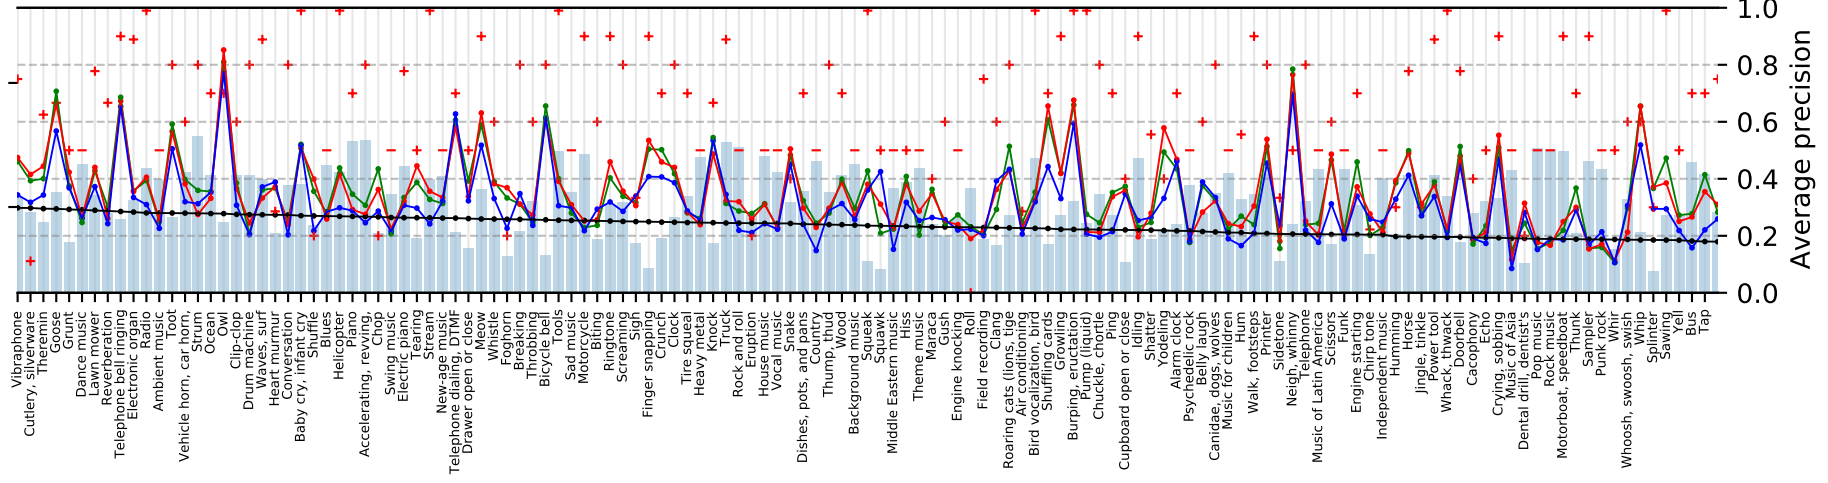

Number of audio clips

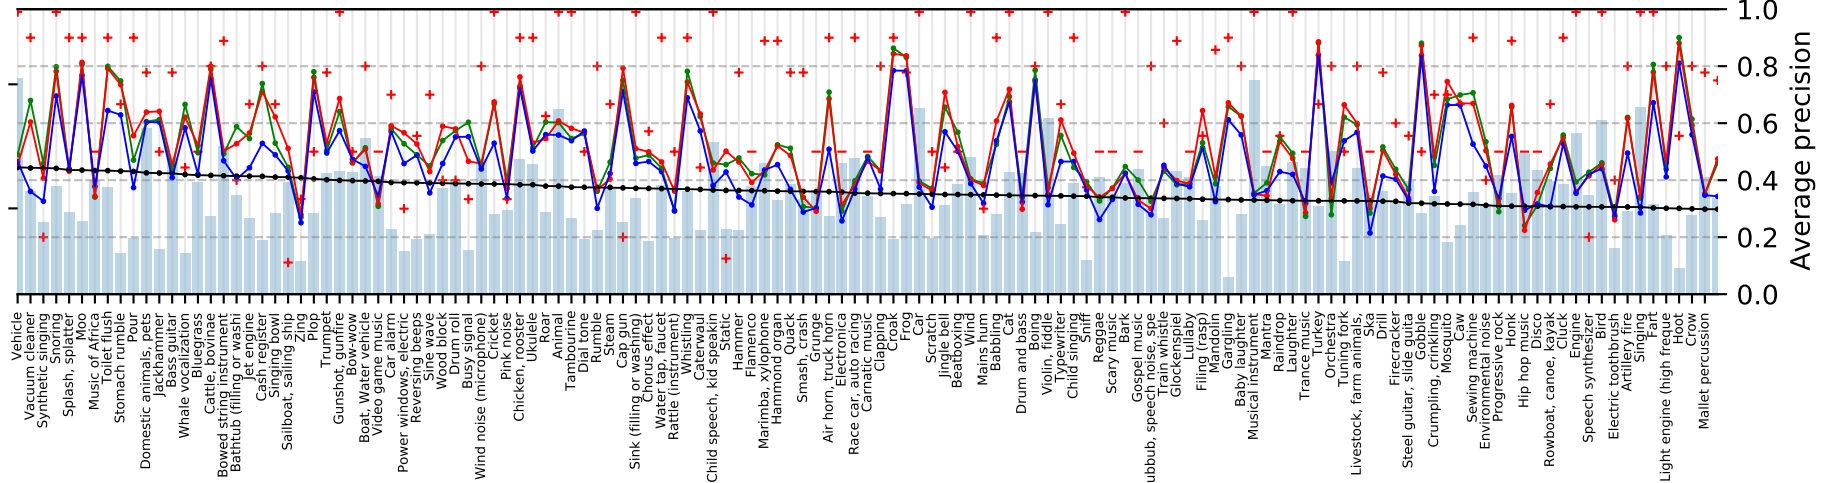

Number of audio clips

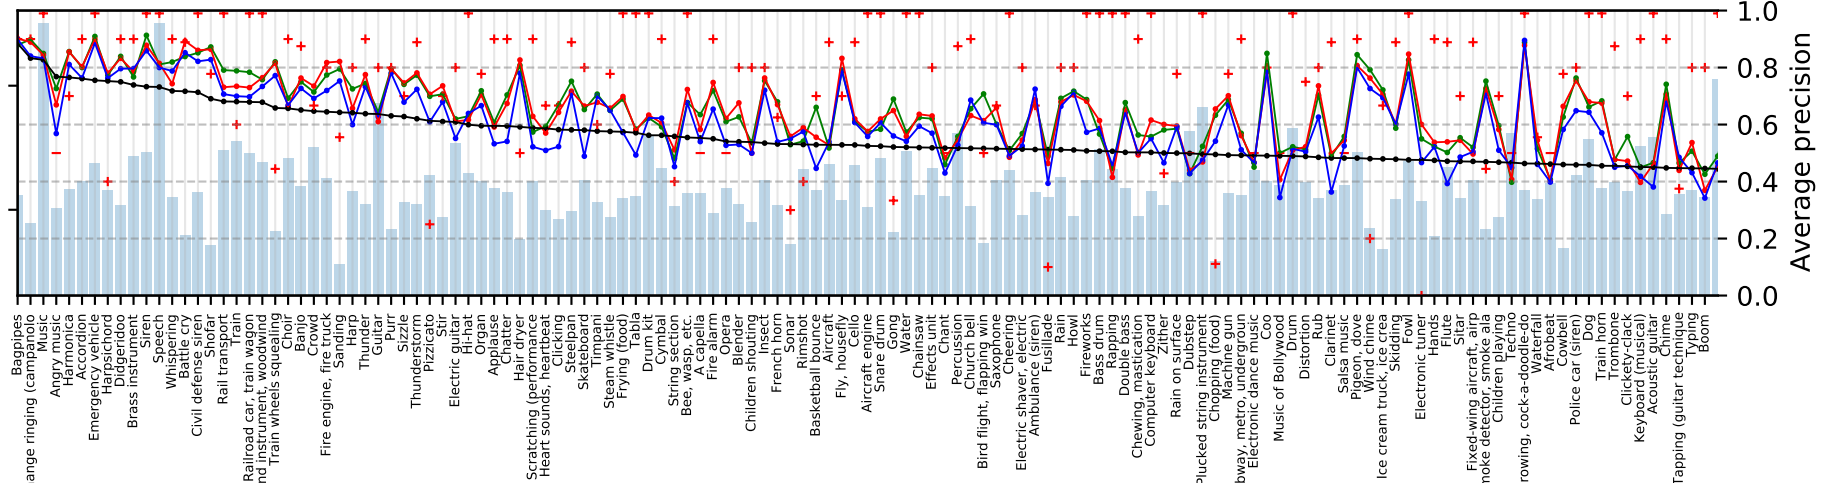

Supplement: supplementary_material [file attachment]

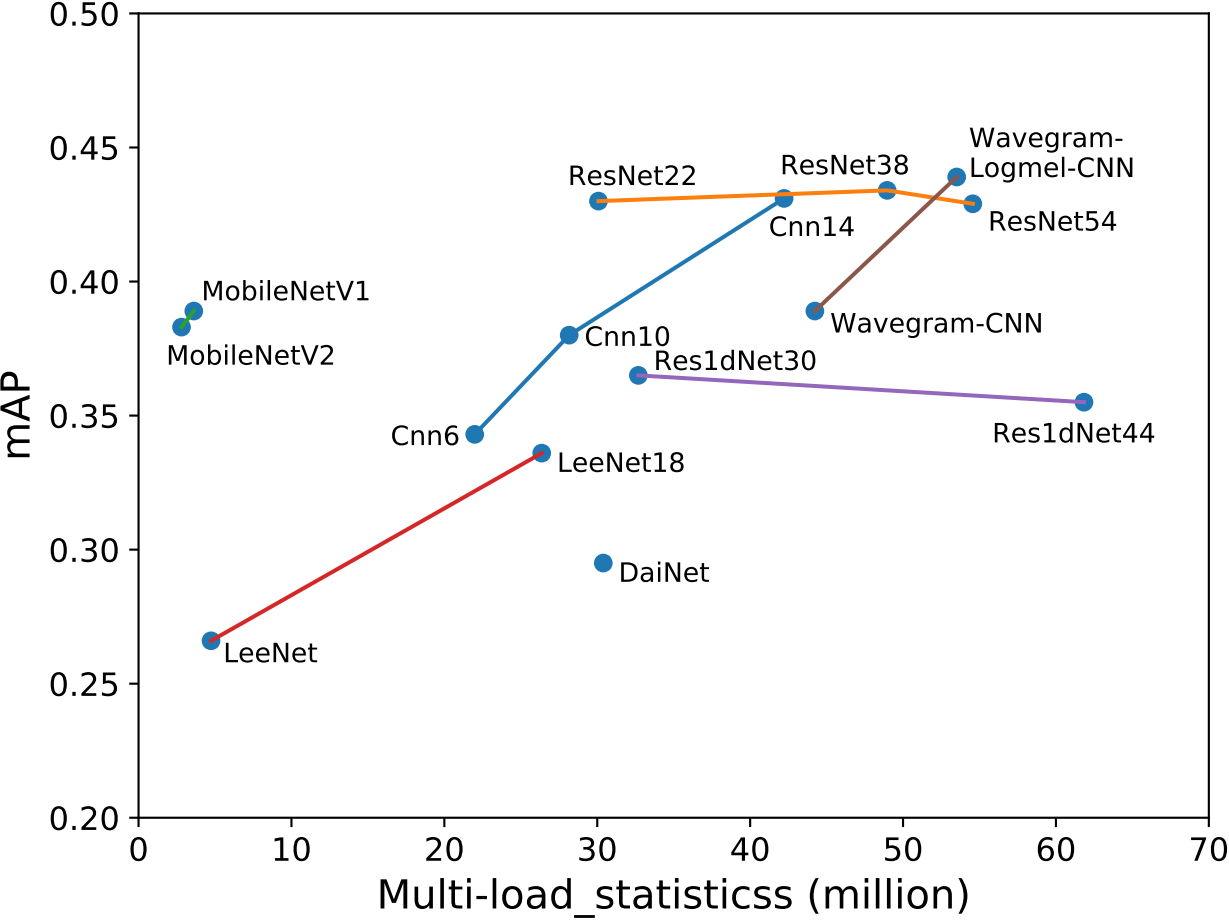

Supplement: supplementary_material [file attachment]
